# Supplementary material for: NDM-1 Introduction in Portugal through a ST11 KL105 Klebsiella pneumoniae Widespread in Europe
Source: MDPI journal article supplement (doi:10.3390/antibiotics11010092), 2022-01-12
Supplement: s1 [file s1]

# NDM-1 Introduction in Portugal through a ST11 KL105 *Klebsiella pneumoniae* Widespread in Europe

Ângela Novais <sup>1,2,\*</sup>, Rita Veiga Ferraz <sup>3</sup>, Mariana Viana <sup>3</sup>, Paula Martins da Costa <sup>3,4</sup> and Luísa Peixe <sup>1,2,\*</sup>

<sup>1</sup> UCIBIO. Laboratório de Microbiologia, Departamento de Ciências Biológicas, Faculdade de Farmácia, Universidade do Porto, 4050-313 Porto, Portugal

<sup>2</sup> Associate Laboratory i4HB—Institute for Health and Bioeconomy, Faculty of Pharmacy, University of Porto, 4050-313 Porto, Portugal

<sup>3</sup> Centro Hospitalar do Tâmega e Sousa, Penafiel, Portugal; rita.ferraz@chts.min-saude.pt (R.V.F.); 60565@chts.min-saude.pt (M.V.); pcmcosta@live.com.pt (P.M.d.C.)

<sup>4</sup> Centro Hospitalar Universitário do Porto, Porto, Portugal

\* Correspondence: aamorim@ff.up.pt; (Â.N.); lpeixe@ff.up.pt (L.P.); Tel.: +351-220-428-580 (Â.N. or L.P.).

**Table S1.** List of *Klebsiella pneumoniae* ST11-KL105 genomes deposited on NCBI public databases used for phylogenetic analysis.

| Strain Name   | Accession number | Country  | Isolation Date |
|---------------|------------------|----------|----------------|
| L176          | GCF_002262735.1  | China    | 2016           |
| L37           | GCF_002262415.1  | China    | 2016           |
| L36           | GCF_002262385.1  | China    | 2016           |
| L50           | GCF_002262115.1  | China    | 2016           |
| L26           | GCF_002262455.1  | China    | 2016           |
| L519          | GCF_002261945.1  | China    | 2016           |
| L447          | GCF_002262145.1  | China    | 2016           |
| L23           | GCF_002262565.1  | China    | 2016           |
| L196          | GCF_002262635.1  | China    | 2016           |
| L84           | GCF_002261575.1  | China    | 2016           |
| L526          | GCF_002261935.1  | China    | 2016           |
| L8            | GCF_002261685.1  | China    | 2016           |
| L442          | GCF_002262175.1  | China    | 2016           |
| L70           | GCF_002261655.1  | China    | 2016           |
| L81           | GCF_002261615.1  | China    | 2016           |
| L63           | GCF_002261785.1  | China    | 2016           |
| XL-1          | GCF_001939845.1  | China    | 2015           |
| KPC40         | GCF_002209465.1  | Brazil   | 2015           |
| K606          | SAMN16522901     | Portugal | 2018           |
| K624          | SAMN16522902     | Portugal | 2019           |
| KP38731       | GCF_002009075.1  | USA      | 2015           |
| EuSCAPE_RO073 | GCF_900504255.1  | Romania  | 2014           |
| EuSCAPE_RO046 | GCF_900504005.1  | Romania  | 2013           |
| EuSCAPE_RO054 | GCF_900504085.1  | Romania  | 2014           |
| GEN000186     | GCF_004146185.1  | France   | 2017           |
| EuSCAPE_PT025 | GCF_900502825.1  | Portugal | 2014           |
| H1523         | GCA_009746735.1  | Portugal | 2011           |
| H642          | GCA_009746705.1  | Portugal | 2006           |
| EuSCAPE_SK022 | GCF_900510755.1  | Slovakia | 2014           |
| EuSCAPE_HU027 | GCF_900516865.1  | Hungary  | 2014           |
| EuSCAPE_PL054 | GCF_900510385.1  | Poland   | 2014           |
| EuSCAPE_PL012 | GCF_900511375.1  | Poland   | 2013           |

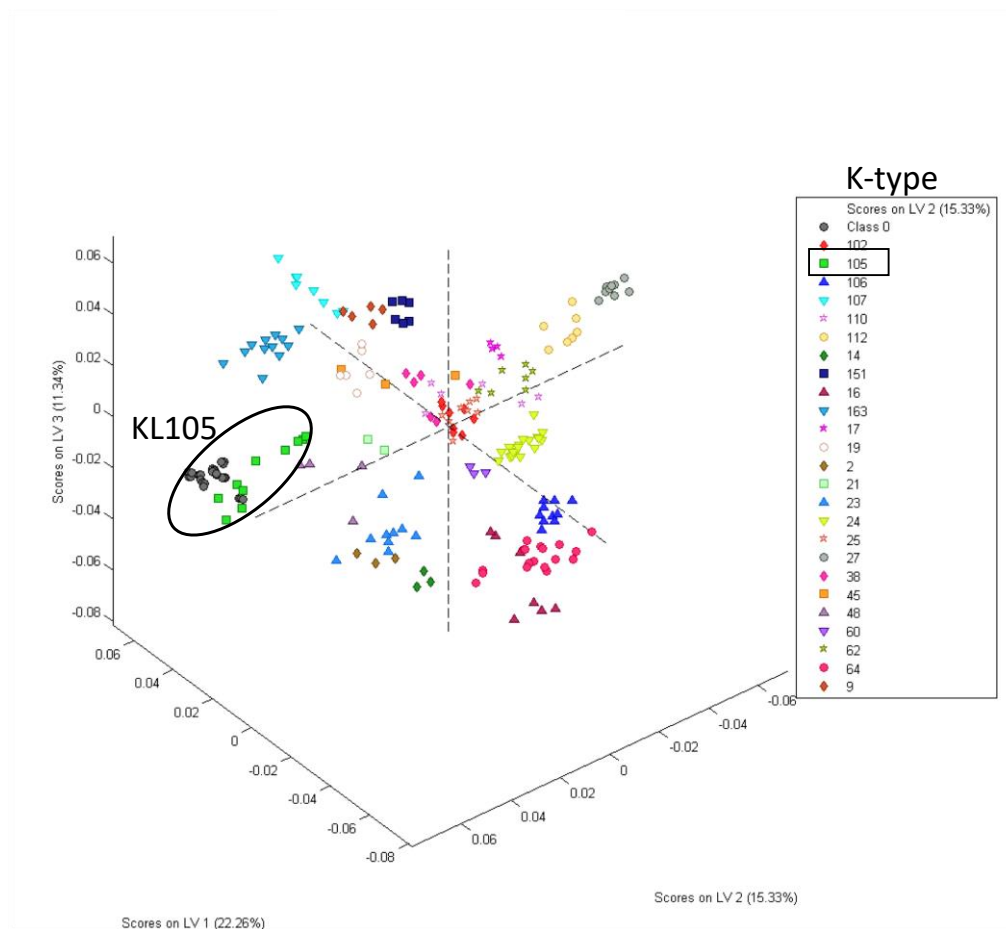

**Figure S1.** Projection of FT-IR spectra from outbreak *K. pneumoniae* isolates (grey dots) in the in-house partial-least squares discriminant model (PLSDA) discriminating 25 K-types.

0

Not yet implemented

0

100

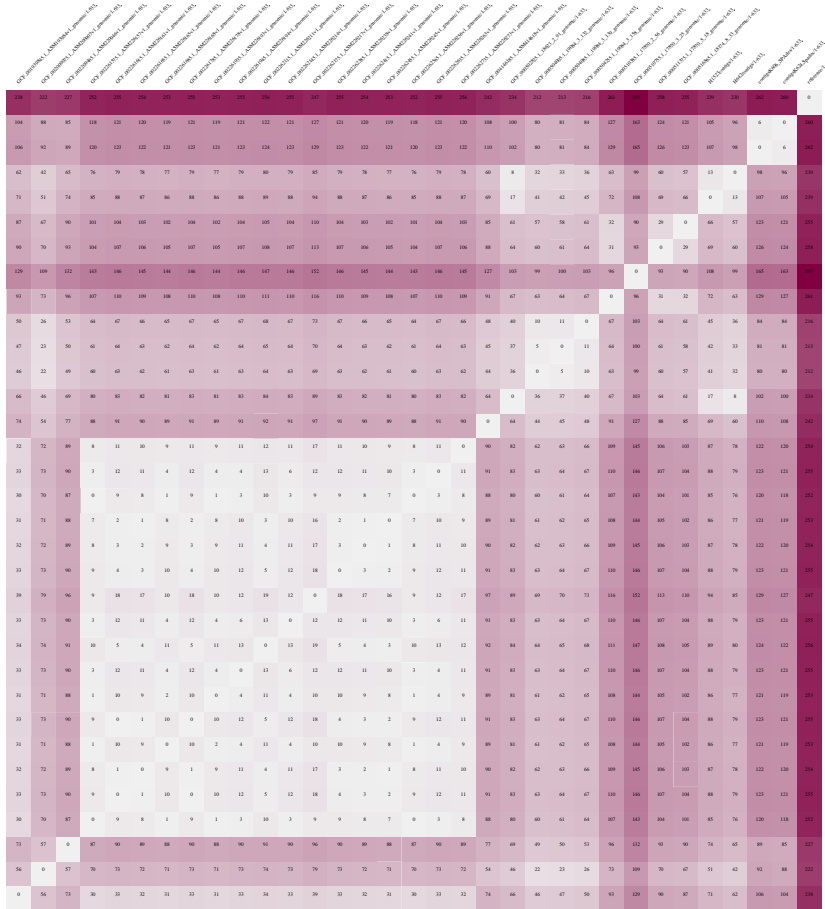

**Figure S2.** SNP matrix obtained from core-genome DNA comparison between *K. pneumoniae* ST11 KL105 genomes supporting phylogenetic tree.
